# Supplementary material
Source: publisher figshare collection journal article supplement (https://gsajournals.figshare.com/ndownloader/files/22441154)
Supplement: Supplementary file 1 [file 22441154]

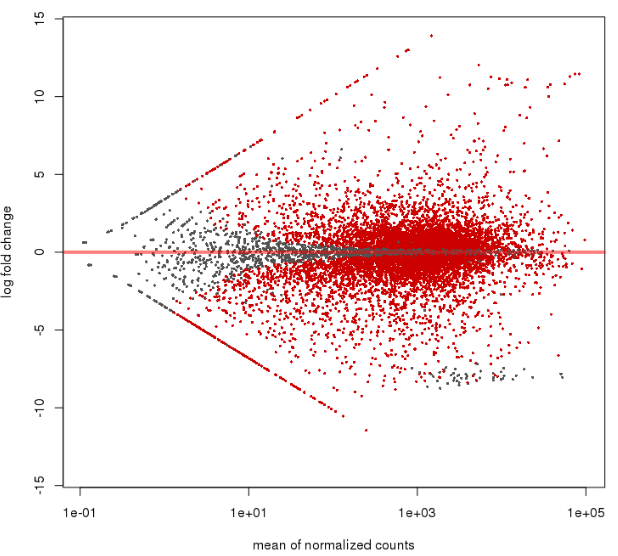


**Figure S1.** MA-plot of RNA-Seq data of *Metarhizium anisopliae* (ESALQ4676) blastospores vs. hyphae. This graphic was generated by the plotMA function in DESeq2. Each dot is represented by one gene.The data represents all four biological samples of blastospores and hyphae.


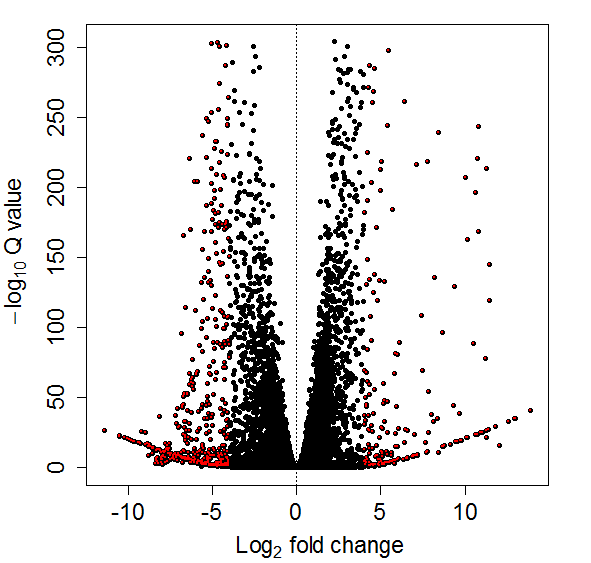


**Figure S2**. Volcano plot of RNA-Seq data of *Metarhizium anisopliae* (ESALQ4676) blastospores vs. hyphae. Each dot is represented by one gene. The red points indicate genes of interest that display large-magnitude fold-changes (*x*-axis) and high statistical significance (-log10 of pvalue, y-axis). The data represents all four biological samples of blastospores and hyphae.
